# Supplementary material for: Area Wide Monitoring of Plant and Honey Bee (Apis mellifera) Viruses in Blueberry (Vaccinium corymbosum) Agroecosystems Facilitated by Honey Bee Pollination
Source: MDPI journal article supplement (doi:10.3390/v15051209), 2023-05-20
Supplement: s1 [file s1]

**Table S1.** Blueberry shock virus, prune dwarf virus, and black queen cell virus coat and capsid protein nucleotide sequence genbank accession numbers and number of mapped reads.

| Sample                             | RNAseq file | Sample type | Mapped reads | Genbank accession |
|------------------------------------|-------------|-------------|--------------|-------------------|
| Blueberry shock virus coat protein |             |             |              |                   |
| BCFV1-BB-4B                        | 21BP028     | Bread       | 1346         | OQ957511          |
| BCFV2-BB-1B                        | 21BP029     | Bread       | 605          | OQ957513          |
| BCFV2-BB-2B                        | 21BP030     | Bread       | 758          | OQ957514          |
| BCFV2-BB-3B                        | 21BP031     | Bread       | 646          | OQ957515          |
| BCFV2-BB-1F                        | 21BP005     | Forager bee | 691          | OQ957516          |
| BCFV2-BB-2F                        | 21BP006     | Forager bee | 1052         | OQ957517          |
| BCFV2-BB-3F                        | 21BP007     | Forager bee | 378          | OQ957518          |
| BCFV2-BB-2H                        | 21BP014     | Hive Bee    | 143          | OQ957520          |
| BCFV2-BB-2P                        | 21BP038     | Pollen      | 335          | OQ957523          |
| BCFV2-BB-3P                        | 21BP039     | Pollen      | 127          | OQ957524          |
| BCFV2-BB-4P                        | 21BP040     | Pollen      | 68           | OQ957525          |
| Prune dwarf virus coat protein     |             |             |              |                   |
| BCFV1-BB-2B                        | 21BP026     | Bee Bread   | 111          | OQ957526          |
| BCFV1-BB-3B                        | 21BP027     | Bee Bread   | 860          | OQ957527          |
| BCFV1-BB-4B                        | 21BP028     | Bee Bread   | 3685         | OQ957528          |
| BCFV1-BB-1H                        | 21BP009     | Hive Bee    | 178          | OQ957529          |
| BCFV1-BB-2H                        | 21BP010     | Hive bee    | 185          | OQ957530          |
| BCFV2-BB-2B                        | 21BP030     | Bee bread   | 1575         | OQ957531          |

|                                         |         |             |       |          |
|-----------------------------------------|---------|-------------|-------|----------|
| BCFV2-BB-4B                             | 21BP032 | Bee Bread   | 271   | OQ957532 |
| BCFV2-BB-1B                             | 21BP029 | Bee Bread   | 4720  | OQ957533 |
| BCFV2-BB-4F                             | 21BP008 | Forager bee | 146   | OQ957534 |
| BCFV2-BB-4H                             | 21BP016 | Hive Bee    | 82    | OQ957535 |
| Black queen cell virus capsid protein 4 |         |             |       |          |
| BCFV1-BB-1F                             | 21BP001 | Forager bee | 14438 | OQ957536 |
| BCFV1-BB-2F                             | 21BP002 | Forager bee | 334   | OQ957537 |
| BCFV1-BB-4F                             | 21BP004 | Forager bee | 9904  | OQ957538 |
| BCFV2-BB-1F                             | 21BP005 | Forager bee | 18080 | OQ957539 |
| BCFV2-BB-2F                             | 21BP006 | Forager bee | 16477 | OQ957540 |
| BCFV2-BB-3F                             | 21BP007 | Forager bee | 7877  | OQ957541 |
| BCFV1-BB-1H                             | 21BP009 | Hive Bee    | 16360 | OQ957542 |
| BCFV2-BB-1H                             | 21BP013 | Hive Bee    | 13911 | OQ957543 |
| BCFV2-BB-2H                             | 21BP014 | Hive Bee    | 5938  | OQ957544 |
| BCFV2-BB-3H                             | 21BP015 | Hive Bee    | 12287 | OQ957545 |
| ON1-BB-1F                               | 21BP017 | Forager bee | 49    | OQ957546 |
| BCFV2-BB-2P                             | 21BP038 | Pollen      | 120   | OQ957547 |

**Table S2:** Sequence read archive accession numbers for RNAseq files

| Accession    | Sample Name |
|--------------|-------------|
| SAMN34718726 | BCFV1-BB-1B |
| SAMN34718727 | BCFV1-BB-2B |
| SAMN34718728 | BCFV1-BB-3B |

|              |             |
|--------------|-------------|
| SAMN34718729 | BCFV1-BB-4B |
| SAMN34718730 | BCFV1-BB-1F |
| SAMN34718731 | BCFV1-BB-2F |
| SAMN34718732 | BCFV1-BB-3F |
| SAMN34718733 | BCFV1-BB-4F |
| SAMN34718734 | BCFV1-BB-1H |
| SAMN34718735 | BCFV1-BB-2H |
| SAMN34718736 | BCFV1-BB-3H |
| SAMN34718737 | BCFV1-BB-4H |
| SAMN34718738 | BCFV1-BB-1P |
| SAMN34718739 | BCFV1-BB-2P |
| SAMN34718740 | BCFV1-BB-3P |
| SAMN34718741 | BCFV1-BB-4P |
| SAMN34718742 | BCFV1-BB-T1 |
| SAMN34718743 | BCFV1-BB-T2 |
| SAMN34718744 | BCFV2-BB-1B |
| SAMN34718745 | BCFV2-BB-2B |
| SAMN34718746 | BCFV2-BB-3B |
| SAMN34718747 | BCFV2-BB-4B |
| SAMN34718748 | BCFV2-BB-1F |
| SAMN34718749 | BCFV2-BB-2F |
| SAMN34718750 | BCFV2-BB-3F |
| SAMN34718751 | BCFV2-BB-4F |
| SAMN34718752 | BCFV2-BB-1H |
| SAMN34718753 | BCFV2-BB-2H |
| SAMN34718754 | BCFV2-BB-3H |
| SAMN34718755 | BCFV2-BB-4H |
| SAMN34718756 | BCFV2-BB-1P |
| SAMN34718757 | BCFV2-BB-2P |
| SAMN34718758 | BCFV2-BB-3P |
| SAMN34718759 | BCFV2-BB-4P |

|              |             |
|--------------|-------------|
| SAMN34718760 | BCFV2-BB-T1 |
| SAMN34718761 | BCFV2-BB-T2 |
| SAMN34718762 | ON1-BB-1B   |
| SAMN34718763 | ON1-BB-2B   |
| SAMN34718764 | ON1-BB-3B   |
| SAMN34718765 | ON1-BB-1F   |
| SAMN34718766 | ON1-BB-2F   |
| SAMN34718767 | ON1-BB-3F   |
| SAMN34718768 | ON1-BB-1H   |
| SAMN34718769 | ON1-BB-2H   |
| SAMN34718770 | ON1-BB-3H   |
| SAMN34718771 | ON1-BB-1P   |
| SAMN34718772 | ON1-BB-2P   |
| SAMN34718773 | ON1-BB-3P   |
| SAMN34718774 | ON1-BB-1T1  |
| SAMN34718775 | ON1-BB-1T2  |

**Table S3.** Bee viruses detected in leaf and flower samples from two BC blueberry farms.

| Bee virus        | Genus      | BC site 1    | BC site 2    | Average frequency of detection (%) | Average genome coverage (%) | Average VRPM |
|------------------|------------|--------------|--------------|------------------------------------|-----------------------------|--------------|
|                  |            | Plant tissue | Plant tissue |                                    |                             |              |
|                  |            | n=2          | n=2          |                                    |                             |              |
|                  |            | Frequency    |              |                                    |                             |              |
| Lake Sinai Virus | Sinaivirus | 100          | 100          | 100                                | 56.6                        | 12           |

**Table S4.** Bee viruses detected in leaf and flower samples from on ON blueberry farm.

| Bee virus              | Genus       | ON site 1    | Average frequency of detection (%) | Average genome coverage (%) | Average VRPM |
|------------------------|-------------|--------------|------------------------------------|-----------------------------|--------------|
|                        |             | Plant tissue |                                    |                             |              |
|                        |             | n=2          |                                    |                             |              |
|                        |             | Frequency    |                                    |                             |              |
| Lake Sinai Virus       | Sinaivirus  | 100          | 100                                | 88.6                        | 236          |
| Black Queen Cell Virus | Triatovirus | 50           | 50                                 | 17.8                        | 32           |
